# Supplementary material for: Loss of the Greatwall Kinase Weakens the Spindle Assembly Checkpoint
Source: PubMed Central journal article supplement (PMC5025047; doi:10.1371/journal.pgen.1006310), 2016-09-15
Supplement: pgen.1006310.s010.pdf [file pgen.1006310.s010.pdf]

Induced/Mastl KO (K0R0)

Forward (Fwd): Control/Mastl WT (K0R0) + Induced/Mastl KO (K8R10)

7-Mar-14

Quantification software: MaxQuant v1.3.0.5

Search parameters: precursor tolerance - 6 ppm, MS/MS tolerance - 0.5 Da

Modifications: Acetyl (Protein N-term), Oxidation (M), Arginine-13C615N4 (R-full), Lysine-13C615N2 (K-full), phospho(STY)

Database: MOUSE.fasta (Jan,2014)

Min. Ratio Count: 1

| Proteins             | Positions within proteins | Gene names | Localization n prob | Score Rev | Localization n prob | Score Fwd | Modified sequence                            | Ratio H/L normalized d Rev | Ratio H/L normalized d Rev_1 | Ratio H/L normalized d Rev_2 | Ratio H/L normalized d Rev_3 | Ratio H/L count Rev | Ratio H/L normalized d Fwd | Ratio H/L normalized d Fwd_1 | Ratio H/L normalized d Fwd_2 | Ratio H/L normalized d Fwd_3 | Ratio H/L count Fwd | Contaminant |
|----------------------|---------------------------|------------|---------------------|-----------|---------------------|-----------|----------------------------------------------|----------------------------|------------------------------|------------------------------|------------------------------|---------------------|----------------------------|------------------------------|------------------------------|------------------------------|---------------------|-------------|
| Q99K01-652           |                           | Pdxdc1     | 1                   | 149.07    | 0.99996             | 108.64    | _QIPVVGSVLNWFs(ph)PVQASQK_                   | 6.4022                     | 6.4022                       | NaN                          | NaN                          | 2                   | 0.11253                    | 0.11253                      | NaN                          | NaN                          | 4                   |             |
| D3Z3Q3;532;78        |                           | Smtn       | 0.9823              | 58.123    | 0.52336             | 38.736    | _LGSVTHVTTFSHAS(ph)PGNR_                     | 4.1538                     | 4.1538                       | NaN                          | NaN                          | 2                   | 0.32055                    | 0.32055                      | NaN                          | NaN                          | 1                   |             |
| Q99K48 452           |                           | Nono       | 0.99901             | 52.721    | 0.99995             | 57.629    | _FGQAATM(ox)EGIGAIGGT(ph)PPAFNRPAAGAEFAPNKR_ | 3.772                      | 3.772                        | NaN                          | NaN                          | 4                   | 0.25427                    | 0.25427                      | NaN                          | NaN                          | 4                   |             |
| P26645 160           |                           | Marcks     | 0.99734             | 99.011    | 0.98009             | 79.089    | _SFKLS(ph)GFSFK_                             | 3.122                      | 3.122                        | NaN                          | NaN                          | 2                   | 0.36731                    | 0.36731                      | NaN                          | NaN                          | 1                   |             |
| E9Q616 3137          |                           | Ahnak      | 0.81949             | 102.52    | 0.83852             | 88.706    | _FKMPFLS(ph)ISSPK_                           | 2.9098                     | 2.9098                       | NaN                          | NaN                          | 1                   | 0.37834                    | 0.37834                      | NaN                          | NaN                          | 1                   |             |
| P35761;P820;794      |                           | Ttk/MPS1   | 0.7862              | 82.36     | 0.80424             | 49.528    | _YVLGQLVGLNS(ph)PNSILK_                      | 2.6738                     | 2.6738                       | NaN                          | NaN                          | 1                   | 0.39392                    | 0.39392                      | NaN                          | NaN                          | 1                   |             |
| Q6NZJ6;1096;1090;108 |                           | Eif4g1     |                     |           | 0.99987             | 56.156    | _ITKPGSIDSNNQLFAPGGRSL(ph)WGK_               | 2.6336                     | 2.6336                       | NaN                          | NaN                          | 2                   | 0.53584                    | 0.53584                      | NaN                          | NaN                          | 4                   |             |
| P99027 17            |                           | Rplp2      | 0.99966             | 243.24    | 0.96568             | 195.13    | _YVASYLALGAGNS(ph)PSAK_                      | 2.5521                     | 2.5521                       | NaN                          | NaN                          | 3                   | 0.41527                    | 0.41527                      | NaN                          | NaN                          | 3                   |             |
| P20152 144           |                           | Vim        | 1                   | 66.809    |                     | 1         | 45.992 _ILLAELEQLKGGKs(ph)R_                 | 2.0562                     | 2.0562                       | NaN                          | NaN                          | 3                   | 0.61511                    | 0.61511                      | NaN                          | NaN                          | 2                   |             |
| Q62523 272           |                           | Zyx        | 0.94304             | 63.488    | 0.8433              | 56.9      | _FTPVVSKFS(ph)PGAPSGPGQPQPNQK_               | 1.927                      | 1.927                        | NaN                          | NaN                          | 1                   | 0.51013                    | 0.51013                      | NaN                          | NaN                          | 2                   |             |
| Q8C156 83            |                           | NcapH      | 0.99983             | 130.21    | 0.98102             | 70.529    | _VFDLQFSTDSIHLAS(ph)PNR_                     | 1.7863                     | 1.7863                       | NaN                          | NaN                          | 2                   | 0.6088                     | 0.6088                       | NaN                          | NaN                          | 1                   |             |
| D3Z576;(2599;2566    |                           | Flnc       |                     |           | 0.51141             | 39.737    | _VTGPRLS(ph)GGHSLHETSTVLVETVTK_              | 2.4593                     | 2.4593                       | NaN                          | NaN                          | 1                   | 0.66324                    | 0.66324                      | NaN                          | NaN                          | 1                   |             |
| Q8BTM8 1084;1060     |                           | Flna       | 1                   | 58.831    |                     | 1         | 47.68 _AFGPGLQGGNAGS(ph)PAR_                 | 2.3843                     | 2.3843                       | NaN                          | NaN                          | 2                   | 0.49626                    | 0.49626                      | NaN                          | NaN                          | 1                   |             |
| Q8BTM8 1750;1742;33  |                           | Flna       | 1                   | 155.17    | 0.95781             | 34.437    | _FGGEHPNSPFQVTALAGDQPTVQT(ph)PLR_            | 1.77                       | 1.77                         | NaN                          | NaN                          | 2                   | 0.56892                    | 0.56892                      | NaN                          | NaN                          | 1                   |             |
