# Supplementary material for: Loss of the Greatwall Kinase Weakens the Spindle Assembly Checkpoint
Source: PubMed Central journal article supplement (PMC5025047; doi:10.1371/journal.pgen.1006310), 2016-09-15
Supplement: pgen.1006310.s011.pdf [file pgen.1006310.s011.pdf]

| Purpose                          | Primer Name  | Sequence                                |
|----------------------------------|--------------|-----------------------------------------|
| Genotyping                       | Pr1 (PKO860) | CATGCCTTCCTTGAAAGAGGTGGAC               |
| Genotyping                       | Pr2 (PKO862) | GTGGGAGGAATTACAAGAGACAAC                |
| Genotyping                       | Pr3 (PKO863) | GGCAGGTGGAGGCAAGAGCTCACAGA              |
| 5' Probe                         | PKO719       | TTAAGGAATCTGACCATTAAGT                  |
| 5' Probe                         | PKO720       | GCCTTGTAATTCACCTTGGTGCA                 |
| 3' Probe                         | PKO756       | CCTAGTTGTAAAACGTAATGCTTA                |
| 3' Probe                         | PKO757       | AGGGATCCCTGTCCCTATCTTTA                 |
| qPCR Mastl fwd                   | PKO1535      | GGAGTATCTTATTGGTGGAGA                   |
| qPCR Mastl rev                   | PKO1536      | AGCATATTGTCCGGTTTCAA                    |
| Cloning GST-Mps1                 | PKO3471      | CCTGGGATCCTATGTTCTGGGCCAA               |
| Cloning GST-Mps1                 | PKO3472      | GCCGCTCGAGTCAAGTTTTAGCAGCTTT            |
| S820A mutagenesis                | PKO3451      | CAACTTGTTGGTCTGAATGCTCCTAACTCCATTTTGAA  |
| S820A mutagenesis                | PKO3452      | TTCAAAAATGGAGTTAGGAGCATTGACACCAACAAGTTG |
| qPCR ENSA fwd                    | PKO3097      | TAAAGGCCAAATACCCAAGC                    |
| qPCR ENSA rev                    | PKO3098      | TTTGCCATGTTGTAGTCTC                     |
| qPCR PPP2R2A/B55 alpha set A fwd | PKO4906      | AGCCATAGCGGTCGTTATATG                   |
| qPCR PPP2R2A/B55 alpha set A rev | PKO4907      | GCAGTCGTTTTTCATACAGTGAG                 |
| qPCR PPP2R2A/B55 alpha set B fwd | PKO4908      | GGAGGGAATGATATTCAGTGGT                  |
| qPCR PPP2R2A/B55 alpha set B rev | PKO4909      | CAACTCTCCCACCTTTATCTCC                  |
| qPCR PPP2R2D/B55 delta set A fwd | PKO4918      | TCCTTGTATGAGAACGACTGC                   |
| qPCR PPP2R2D/B55 delta set A rev | PKO4919      | TGAGGCTTCCAGTGTAACATC                   |
| qPCR PPP2R2D/B55 delta set B fwd | PKO4920      | TGCAACAGGAGACAAAGGTG                    |
| qPCR PPP2R2D/B55 delta set B rev | PKO4921      | GGCTCATGACTCTGAAAGGTAC                  |
| qPCR PPP2R5A/B56 alpha set A fwd | PKO4922      | TCCTACAAAGCCGAAAGACAG                   |
| qPCR PPP2R5A/B56 alpha set A rev | PKO4923      | CTGCGAATACTGTGCATGTTG                   |
| qPCR PPP2R5A/B56 alpha set B fwd | PKO4924      | TGGTGTAATTGTTGAATCAGCG                  |
| qPCR PPP2R5A/B56 alpha set B rev | PKO4925      | AACTGTATGTGAGGCCAAGAG                   |
| qPCR PPP2R5B/B56 beta set A fwd  | PKO4926      | CTTCTCAGTTCGCTATCAGAG                   |
| qPCR PPP2R5B/B56 beta set A rev  | PKO4927      | GTCAAACATCACCCACATTG                    |
| qPCR PPP2R5B/B56 beta set B fwd  | PKO4928      | TTGACAGAGCATGTTATCCGG                   |
| qPCR PPP2R5B/B56 beta set B rev  | PKO4929      | CCTGGATCTTCACAAACTGGG                   |
| qPCR PPP2R5C/B56 gamma set A fwd | PKO4930      | GCCAAATGTGTTTCCAGCC                     |
| qPCR PPP2R5C/B56 gamma set A rev | PKO4931      | TTGAGTTGCGGTATAAGGACG                   |
| qPCR PPP2R5C/B56 gamma set B fwd | PKO4932      | TTCCGTCCTTATAACCGCAAC                   |
| qPCR PPP2R5C/B56 gamma set B rev | PKO4933      | GCTTCTCTTTGAGTTTCTCTGC                  |
| qPCR PPP2R5D/B56 delta set A fwd | PKO4934      | GGCCGAGATGTCCTATAAACTG                  |
| qPCR PPP2R5D/B56 delta set A rev | PKO4935      | GGATGATGGTGAAGTACTGACTG                 |

---

|                                    |         |                        |
|------------------------------------|---------|------------------------|
| qPCR PPP2R5D/B56 delta set B fwd   | PKO4936 | AGGAACTCCAAAAGCCACTG   |
| qPCR PPP2R5D/B56 delta set B rev   | PKO4937 | TCCTTCATTCGGAACCTGC    |
| qPCR PPP2R5E/B56 epsilon set A fwd | PKO4938 | TCTTGGATGTGATTGAACCGTC |
| qPCR PPP2R5E/B56 epsilon set A rev | PKO4939 | AATAGAGTGCCCTTTCTGCC   |
| qPCR PPP2R5E/B56 epsilon set B fwd | PKO4940 | CATGGCCCCACTTACAGC     |
| qPCR PPP2R5E/B56 epsilon set B rev | PKO4941 | AGGGTCTTCACTGTCAAATAGC |
| qPCR eEF2 fwd                      | PKO3215 | CACTTACCATCCCCCGTCAC   |
| qPCR eEF2 rev                      | PKO3216 | CTTTGGGGTTCGCAGCTCTTA  |

---
